# Supplementary material for: Integrated Care Programs for People with Multimorbidity in European Countries: eHealth Adoption in Health Systems
Source: Hindawi journal article supplement (doi:10.1155/2020/9025326), 2020-01-01
Supplement: f2 [file 9025326.f2.zip]

**Supplementary Table S1: Health system characteristics and countries/groups of countries**

| <b>Countries</b> (in bold<br>ICARE4EU countries)     | <b>National health model<sup>a</sup></b> | <b>Overall Strength of PC<sup>b</sup></b> | <b>Level of(de)centralization<br/>of health system<sup>c</sup></b> |
|------------------------------------------------------|------------------------------------------|-------------------------------------------|--------------------------------------------------------------------|
| <b>Austria</b>                                       | SIS                                      | Weak                                      | Decentralized                                                      |
| <b>Belgium</b>                                       | SIS                                      | Strong                                    | Decentralized                                                      |
| <b>Bulgaria</b>                                      | TC                                       | Weak                                      | Decentralized                                                      |
| <b>Croatia</b>                                       | TC                                       | (data not included)                       | Centralized                                                        |
| <b>Cyprus</b>                                        | NHS                                      | Weak                                      | Centralized                                                        |
| Czech Rep.                                           | TC                                       | Medium                                    | Decentralized                                                      |
| <b>Denmark</b>                                       | NHS                                      | Strong                                    | Decentralized                                                      |
| Estonia                                              | TC                                       | Strong                                    | Centralized                                                        |
| <b>Finland</b>                                       | NHS                                      | Strong                                    | Decentralized                                                      |
| France                                               | SIS                                      | Medium                                    | Decentralized                                                      |
| <b>Germany</b>                                       | SIS                                      | Medium                                    | Decentralized                                                      |
| <b>Greece</b>                                        | NHS                                      | Weak                                      | Centralized                                                        |
| Hungary                                              | TC                                       | Weak                                      | Centralized                                                        |
| <b>Iceland</b>                                       | NHS                                      | Weak                                      | Decentralized                                                      |
| <b>Ireland</b>                                       | SIS                                      | Weak                                      | Centralized                                                        |
| <b>Italy</b>                                         | NHS                                      | Medium                                    | Decentralized                                                      |
| <b>Latvia</b>                                        | TC                                       | Medium                                    | Centralized                                                        |
| <b>Lithuania</b>                                     | TC                                       | Strong                                    | Centralized                                                        |
| <b>Luxembourg</b>                                    | SIS                                      | Weak                                      | Centralized                                                        |
| <b>Malta</b>                                         | NHS                                      | Weak                                      | Centralized                                                        |
| <b>Netherlands</b>                                   | SIS                                      | Strong                                    | Centralized                                                        |
| <b>Norway</b>                                        | NHS                                      | Medium                                    | Decentralized                                                      |
| Poland                                               | TC                                       | Medium                                    | Decentralized                                                      |
| <b>Portugal</b>                                      | NHS                                      | Strong                                    | Decentralized                                                      |
| Romania                                              | TC                                       | Medium                                    | Decentralized                                                      |
| Slovak Rep.                                          | TC                                       | Weak                                      | Decentralized                                                      |
| <b>Slovenia</b>                                      | TC                                       | Strong                                    | Centralized                                                        |
| <b>Spain</b>                                         | NHS                                      | Strong                                    | Decentralized                                                      |
| <b>Sweden</b>                                        | NHS                                      | Medium                                    | Decentralized                                                      |
| <b>Switzerland</b>                                   | (data not included)                      | Medium                                    | Centralized                                                        |
| Turkey                                               | SIS                                      | Weak                                      | Centralized                                                        |
| <b>United Kingdom (only<br/>England in ICARE4EU)</b> | NHS                                      | Strong                                    | Centralized                                                        |

<sup>a</sup> Codagnone et al., 2013 [32]; Brennan et al., 2015 [47]. NHS=National Health Service; SIS=Social Insurance System; TC=Transition Countries. Information on Switzerland was not collected because the related study was conducted in 31 countries (EU27 plus Croatia, Iceland, Norway, and Turkey). Data gathering process could start in November of 2012, and was mostly completed between January and March 2013. Croatia was included in the study although it was included in EU(28) in July 2013.

<sup>b</sup> Kringos et al. 2013 [68]; Detollenaere et al., 2017 [50]. Croatia was not collected, given that the survey kept in consideration EU27 within 2010 (plus Iceland, Norway, Switzerland and Turkey).

<sup>c</sup> WHO, Health System in Transition series (years from 2008 to 2013) [69]. <http://www.euro.who.int/en/about-us/partners/observatory/health-systems-in-transition-hit-series> (Countries' latest - in 2013 - health system review).
