# Supplementary material for: Integrated Care Programs for People with Multimorbidity in European Countries: eHealth Adoption in Health Systems
Source: Biomed Res Int. 2020 Apr 8;2020:9025326. doi: 10.1155/2020/9025326 (PMC7168691; doi:10.1155/2020/9025326)
Supplement: Supplementary Materials — Supplementary Table S1: health system characteristics and countries/groups of countries. Supplementary Text S1: text boxes with aim, main activities, and eHealth aspects of HPPs which were selected in Denmark, Finland, and Spain. [file 9025326.f2.zip]

Archive with 2 entries (2 files):
- 9025326.f1.pdf
- 9025326.f2.pdf
